# Supplementary material for: Oral Administration of Valganciclovir Reduces Clinical Signs, Virus Shedding and Cell-Associated Viremia in Ponies Experimentally Infected with the Equid Herpesvirus-1 C2254 Variant
Source: MDPI journal article supplement (doi:10.3390/pathogens11050539), 2022-05-04
Supplement: s1 [file s1]

|               | Pathogens/SNP | Nasopharyngeal swab     |      |      |      | Blood |      |      |      |
|---------------|---------------|-------------------------|------|------|------|-------|------|------|------|
|               |               | D+5                     | D+10 | D+16 | D+20 | D+5   | D+10 | D+16 | D+20 |
| Treated group | Pony A        | EHV-1 A <sub>2254</sub> | /    | /    | /    | /     | /    | /    | /    |
|               |               | EHV-1 G <sub>2254</sub> | /    | /    | /    | /     | /    | /    | /    |
|               |               | EHV-1 C <sub>2254</sub> | 27.4 | 31.2 | 37.2 | /     | /    | 34.5 | 37.9 |
|               |               | EHV-4                   | /    | /    | /    | /     | /    | /    | /    |
|               | Pony B        | EHV-1 A <sub>2254</sub> | /    | /    | /    | /     | /    | /    | /    |
|               |               | EHV-1 G <sub>2254</sub> | /    | /    | /    | /     | /    | /    | /    |
|               |               | EHV-1 C <sub>2254</sub> | 28.2 | 33.7 | 36.4 | 38.1  | /    | 35.4 | /    |
|               |               | EHV-4                   | /    | /    | /    | /     | /    | /    | /    |
|               | Pony C        | EHV-1 A <sub>2254</sub> | /    | /    | /    | /     | /    | /    | /    |
|               |               | EHV-1 G <sub>2254</sub> | /    | /    | /    | /     | /    | /    | /    |
|               |               | EHV-1 C <sub>2254</sub> | 27.8 | 24.5 | 37.8 | 39.9  | /    | 36.5 | /    |
|               |               | EHV-4                   | /    | /    | /    | /     | /    | /    | /    |
|               | Pony D        | EHV-1 A <sub>2254</sub> | /    | /    | /    | /     | /    | /    | /    |
|               |               | EHV-1 G <sub>2254</sub> | /    | /    | /    | /     | /    | /    | /    |
|               |               | EHV-1 C <sub>2254</sub> | 27.3 | 28.7 | 37.8 | 28.6  | /    | 33.8 | /    |
|               |               | EHV-4                   | /    | /    | /    | /     | /    | /    | /    |
| Control group | Pony E        | EHV-1 A <sub>2254</sub> | /    | /    | /    | /     | /    | /    | /    |
|               |               | EHV-1 G <sub>2254</sub> | /    | /    | /    | /     | /    | /    | /    |
|               |               | EHV-1 C <sub>2254</sub> | 24.5 | 28.5 | 37.3 | 39.1  | /    | 32.1 | /    |
|               |               | EHV-4                   | /    | /    | /    | /     | /    | /    | /    |
|               | Pony F        | EHV-1 A <sub>2254</sub> | /    | /    | /    | /     | /    | /    | /    |
|               |               | EHV-1 G <sub>2254</sub> | /    | /    | /    | /     | /    | /    | /    |
|               |               | EHV-1 C <sub>2254</sub> | 24.8 | 30.5 | 33.8 | 38.4  | /    | 31.5 | 36.4 |
|               |               | EHV-4                   | /    | /    | /    | /     | /    | /    | /    |
|               | Pony G        | EHV-1 A <sub>2254</sub> | /    | /    | /    | /     | /    | /    | /    |
|               |               | EHV-1 G <sub>2254</sub> | /    | /    | /    | /     | /    | /    | /    |
|               |               | EHV-1 C <sub>2254</sub> | 24.0 | 31.3 | 36.1 | /     | /    | 33.0 | 38.9 |
|               |               | EHV-4                   | /    | /    | /    | /     | /    | /    | /    |
|               | Pony H        | EHV-1 A <sub>2254</sub> | /    | /    | /    | /     | /    | /    | /    |
|               |               | EHV-1 G <sub>2254</sub> | /    | /    | /    | /     | /    | /    | /    |
|               |               | EHV-1 C <sub>2254</sub> | 25.0 | 33.3 | 36.6 | 39.6  | /    | 30.8 | 37.3 |
|               |               | EHV-4                   | /    | /    | /    | /     | /    | /    | /    |

Each value corresponds to a Ct value determined by qPCR (Ct  $\geq$  40 were considered negative).

SNP: Single Nucleotide Polymorphism; A<sub>2254</sub>: Arginine at position 2254 in the EHV-1 DNA polymerase; G<sub>2254</sub>: Guanine at position 2254 in the EHV-1 DNA polymerase; C<sub>2254</sub>: Cytosine at position 2254 in the EHV-1 DNA polymerase; "/": no signal detected.
