# Supplementary material for: Oral Administration of Valganciclovir Reduces Clinical Signs, Virus Shedding and Cell-Associated Viremia in Ponies Experimentally Infected with the Equid Herpesvirus-1 C2254 Variant
Source: MDPI journal article supplement (doi:10.3390/pathogens11050539), 2022-05-04

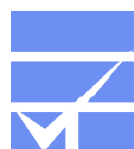

# CONSORT

TRANSPARENT REPORTING of TRIALS

**CONSORT 2010 Flow Diagram:** Oral administration of valganciclovir reduces clinical signs, virus shedding and cell-associated viremia in ponies experimentally infected with the equid herpesvirus-1 C<sub>2254</sub> variant.

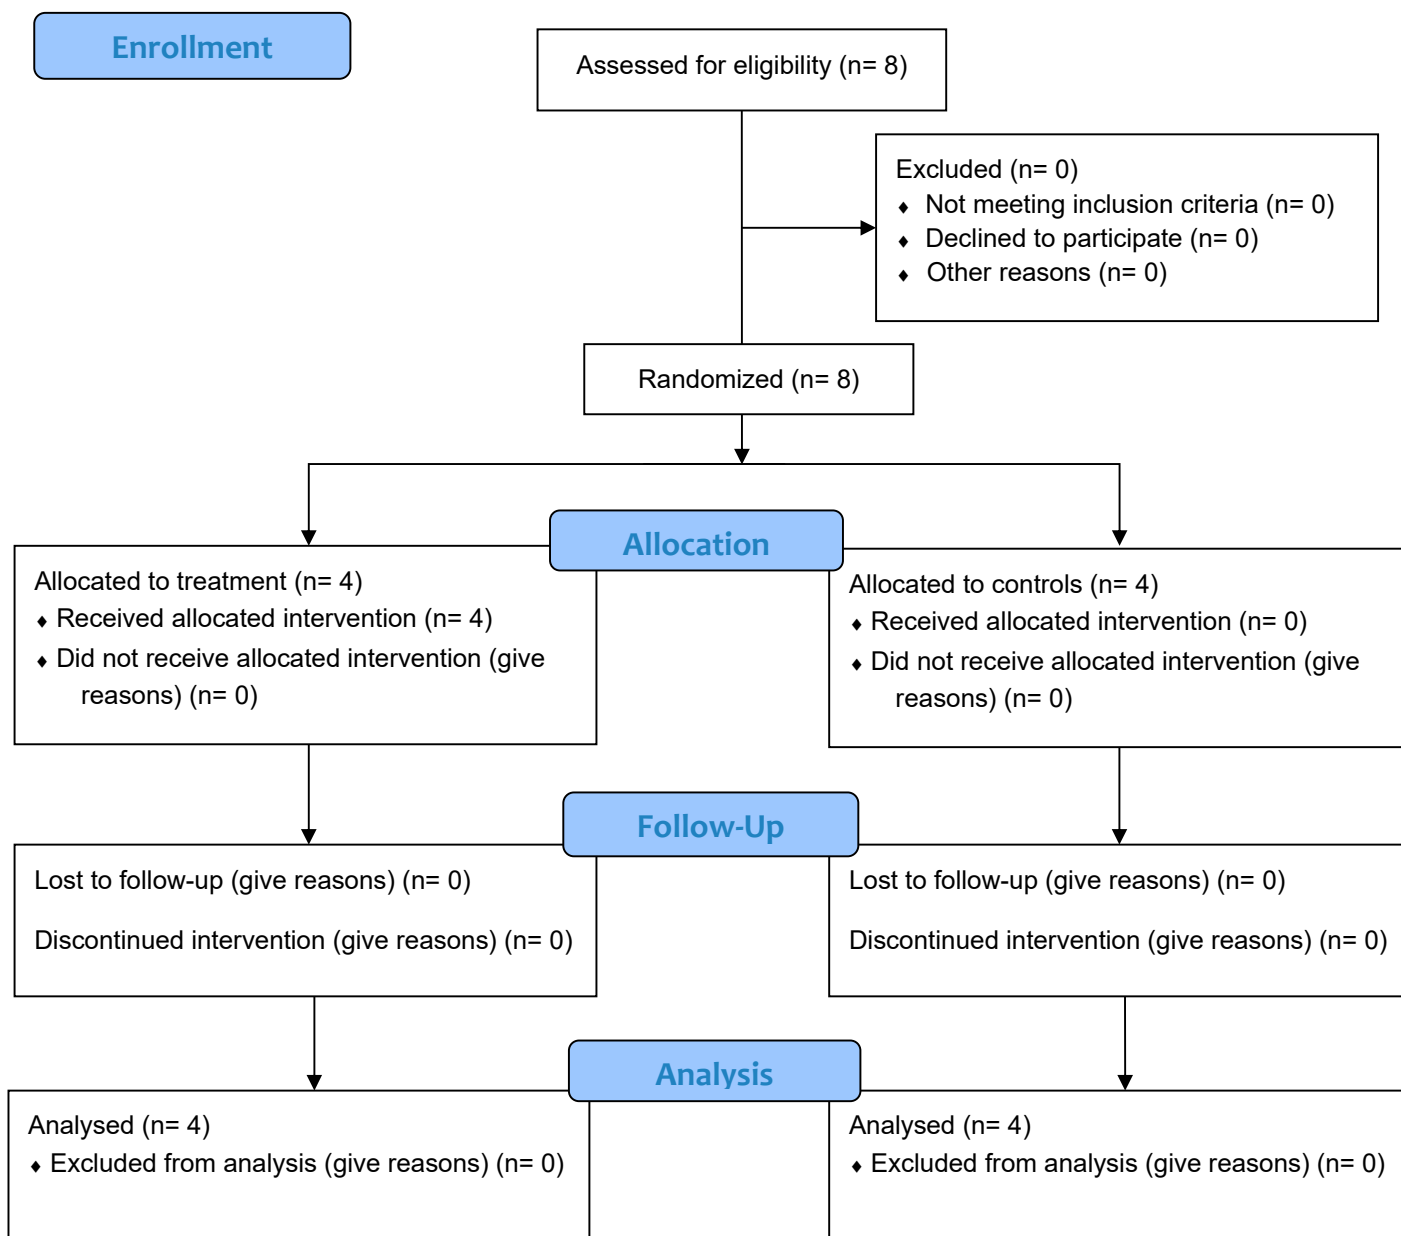

Supplement: s1 [file s1]
