# Supplementary material for: Oral Administration of Valganciclovir Reduces Clinical Signs, Virus Shedding and Cell-Associated Viremia in Ponies Experimentally Infected with the Equid Herpesvirus-1 C2254 Variant
Source: MDPI journal article supplement (doi:10.3390/pathogens11050539), 2022-05-04
Supplement: s1 [file s1]

| Clinical signs        | Score | Description                                                                         |
|-----------------------|-------|-------------------------------------------------------------------------------------|
| Behaviour             | 0     | Normal                                                                              |
|                       | 1     | Quiet and nearly lethargic                                                          |
|                       | 2     | Severe depression                                                                   |
| Rectal temperature    | 0     | Normal ( $\leq 38.8$ °C)                                                            |
|                       | 1     | Low fever ( $> 38.8$ °C to $\leq 39.4$ °C)                                          |
|                       | 2     | Moderate fever ( $>39.4$ °C to $\leq 40.0$ °C)                                      |
|                       | 3     | Severe fever ( $> 40.0$ °C)                                                         |
| Nasal discharge       | 0     | No discharge                                                                        |
|                       | 1     | Slightly and unilateral discharge                                                   |
|                       | 2     | Slightly and bilateral discharge                                                    |
|                       | 3     | Abundant and bilateral discharge or abundant and unilateral muco-purulent discharge |
|                       | 4     | Abundant and bilateral muco-purulent discharge                                      |
| Cough                 | 0     | No coughing                                                                         |
|                       | 1     | Coughing once during 30 min.                                                        |
|                       | 2     | Coughing two or more times during 30 min.                                           |
| Ocular discharge      | 0     | No discharge                                                                        |
|                       | 1     | Slightly to moderate discharge                                                      |
|                       | 2     | Abundant discharge                                                                  |
| Mandibular lymph node | 0     | Barely palpable                                                                     |
|                       | 1     | Green peas-sized                                                                    |
|                       | 2     | Bean-sized                                                                          |
|                       | 3     | nuts sized                                                                          |
