# Supplementary material for: Oral Administration of Valganciclovir Reduces Clinical Signs, Virus Shedding and Cell-Associated Viremia in Ponies Experimentally Infected with the Equid Herpesvirus-1 C2254 Variant
Source: MDPI journal article supplement (doi:10.3390/pathogens11050539), 2022-05-04
Supplement: s1 [file s1]

(a)

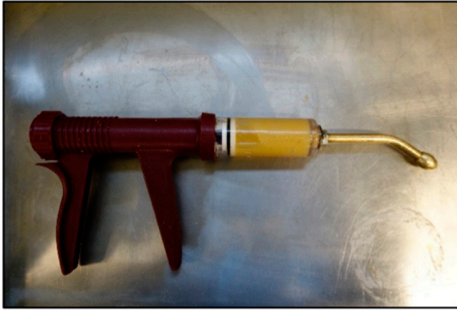

(b)

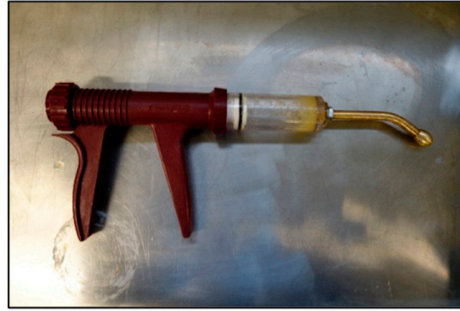

**Figure S4.** (a) Drug gun loaded with apple compote and apple juice  $\pm$  valganciclovir. (b) Drug gun after treatment administration to ponies. A small volume of apple compote remains in the drug gun after each utilisation and was estimated to be less than 10% of initial volume. One specific drug gun was affected for each group for the duration of the study.
