# Supplementary material for: Oral Administration of Valganciclovir Reduces Clinical Signs, Virus Shedding and Cell-Associated Viremia in Ponies Experimentally Infected with the Equid Herpesvirus-1 C2254 Variant
Source: MDPI journal article supplement (doi:10.3390/pathogens11050539), 2022-05-04
Supplement: s1 [file s1]

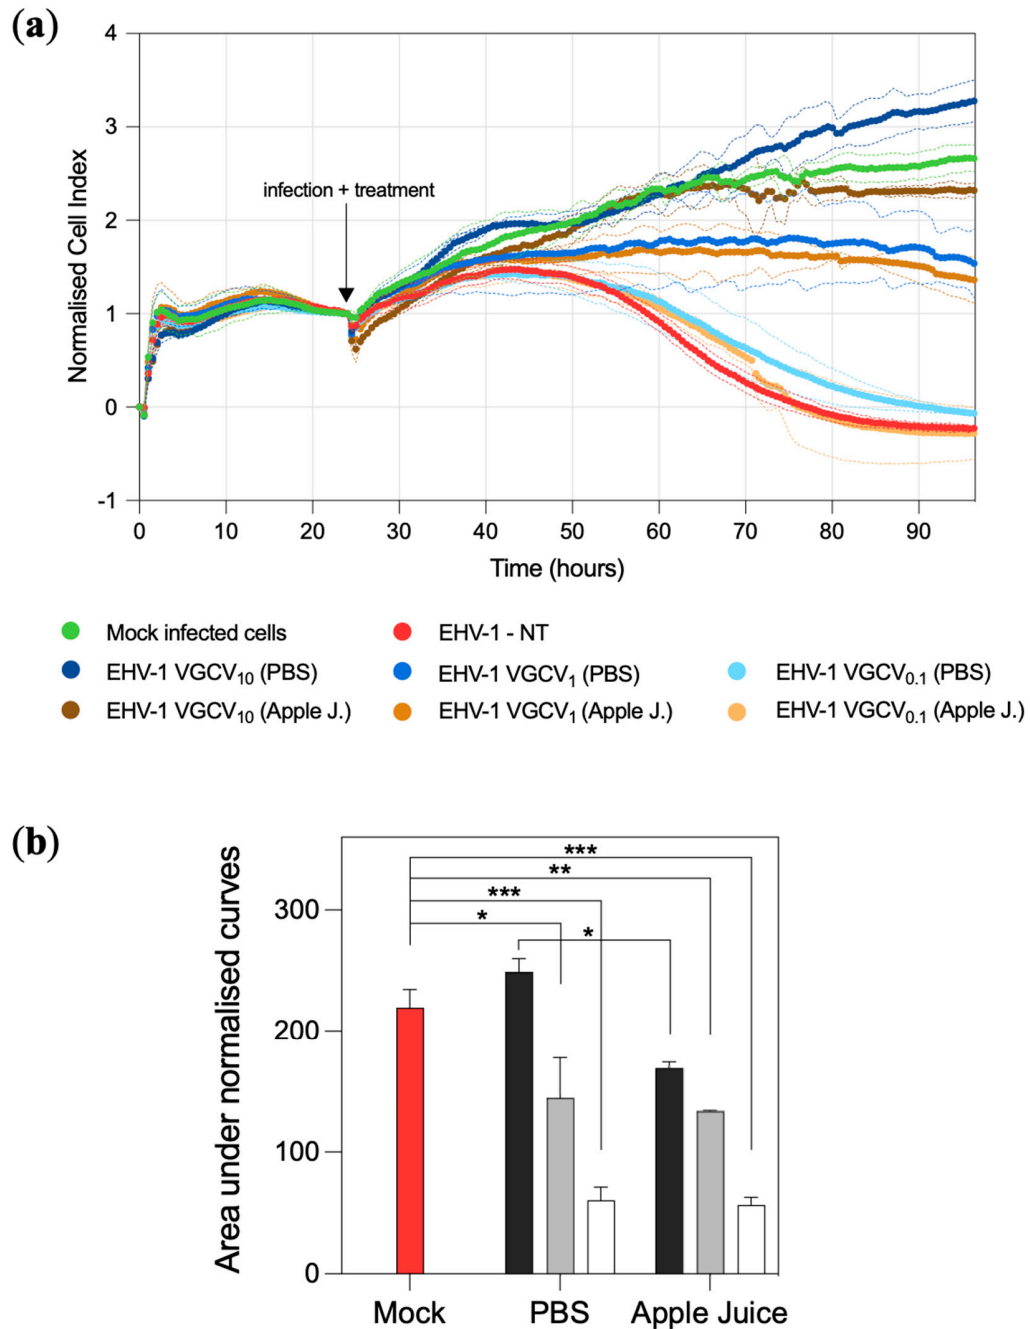

**Figure S1.** (a) Real time monitoring of E. Derm cells infected or not by EHV-1 KyD strain and treated with valganciclovir (VGCV) dissolved over-night at 4°C in PBS or apple juice. The Cell Index was normalized ( $CI_n$ ) at the last time point before infection (black arrow). The red curve represents the  $CI_n$  of untreated EHV-1 infected cells (NT). The green curve represents the  $CI_n$  of mock infected cells. Blue and orange shade curves represent the  $CI_n$  of EHV-1 infected cells and treated with VGCV at 10 µg/mL (VGCV<sub>10</sub>), 1 µg/mL (VGCV<sub>1</sub>) and 0.1 µg/mL (VGCV<sub>0.1</sub>) dissolved in PBS (PBS) in apple juice (Apple J.), respectively. Each data point indicates the mean  $\pm$  standard deviation of one assay in duplicate. (b) Evaluation of the area under curves of the  $CI_n$ . Three independent experiments were performed in duplicate (\* $p < 0.05$ , \*\* $p < 0.01$ , \*\*\* $p < 0.001$ ).
