# Supplementary material for: Oral Administration of Valganciclovir Reduces Clinical Signs, Virus Shedding and Cell-Associated Viremia in Ponies Experimentally Infected with the Equid Herpesvirus-1 C2254 Variant
Source: MDPI journal article supplement (doi:10.3390/pathogens11050539), 2022-05-04
Supplement: s1 [file s1]

| Virus | Target gene                  | Primers and probe sequences (5'-3')                                                                                                                                                                                      | Product size (bp) | Thermoprofile                                       | Reference                                                             |
|-------|------------------------------|--------------------------------------------------------------------------------------------------------------------------------------------------------------------------------------------------------------------------|-------------------|-----------------------------------------------------|-----------------------------------------------------------------------|
| EHV-1 | Viral DNA polymerase (ORF30) | F: CCACCCTGGCGCTCG<br>R: AGCCAGTCGCGCAGCAAGATG<br>P (G <sub>2254</sub> ): FAM-TCC GTC GAC TAC TC-MGB-NFQ<br>P (A <sub>2254</sub> ): VIC-CATCCGTCAACTACTC-MGB-NFQ<br>P (C <sub>2254</sub> ): NED-CATCCGTCCACTACTC-MGB-NFQ | 145               | 95 °C (10 min.)<br>95 °C (15 sec.)<br>62°C (1 min.) | x55<br>Allen <i>et al.</i> , 2007<br>&<br>Sutton <i>et al.</i> , 2020 |
| EHV-1 | gB                           | F: CATGTCAACGCACTCCCA<br>R: GGGTCGGGCGTTTCTGT<br>P: FAM-CCCTACGCTGCTCC-MGB-NFQ                                                                                                                                           | 63                | 95 °C (10 min.)<br>95 °C (15 sec.)<br>62°C (1 min.) | x45<br>Diallo <i>et al.</i> , 2006                                    |
| EHV-4 | gB                           | F: GGGCTATTGGATTACAGCGAGAT<br>R: TAGAATCGGAGGGCGTGAAG<br>P: VIC-CAGCGCCGTAACCAG-MGB-NFQ                                                                                                                                  | 58                | 95 °C (10 min.)<br>95 °C (15 sec.)<br>60°C (1 min.) | x45<br>Diallo <i>et al.</i> , 2007                                    |
| EHV-2 | gB                           | F: CCTCAACCTGACTGACATACCCA<br>R: TTTAGAATAGAGCTCAATCACCTTAAAATC<br>P: FAM-CACCATGATTACCCTGAACCTGTCTCTGGT-BHQ1                                                                                                            | 100               | 95 °C (10 min.)<br>95 °C (15 sec.)<br>60°C (1 min.) | x45<br>Brault <i>et al.</i> , 2010                                    |
| EHV-5 | gB                           | F: AACCCGCCGTGCATCA<br>R: AGGCGCCACACACCCTAA<br>P: FAM-ACAACACCACCAACCCCTTTCTGCTG-BHQ1                                                                                                                                   | 66                | 95 °C (10 min.)<br>95 °C (15 sec.)<br>60°C (1 min.) | x45<br>Hue <i>et al.</i> , 2014                                       |
| EIV   | M                            | F: AGATGAGYCTTCTAACCGAGGTCG<br>R : TGCAAANACATCYTCAAGTCTCTG<br>P: FAM-TCAGGCCCCCTCAAAGCCGA-BHQ1                                                                                                                          | 102               | 95 °C (10 min.)<br>95 °C (15 sec.)<br>60°C (1 min.) | x45<br>Heine <i>et al.</i> , 2007                                     |

bp: base pair; EHV: Equid Herpesvirus; EIV: Equine Influenza Virus; gB: glycoprotein B; ORF: Open Reading Frame; F: Forward; R: Reverse; P: Probe
